# Supplementary material
Source: Springer Nature journal article supplement (https://www.springermedizin.de/resource/supplementary/13054_2012_606_MOESM1_ESM.pdf/9708834)

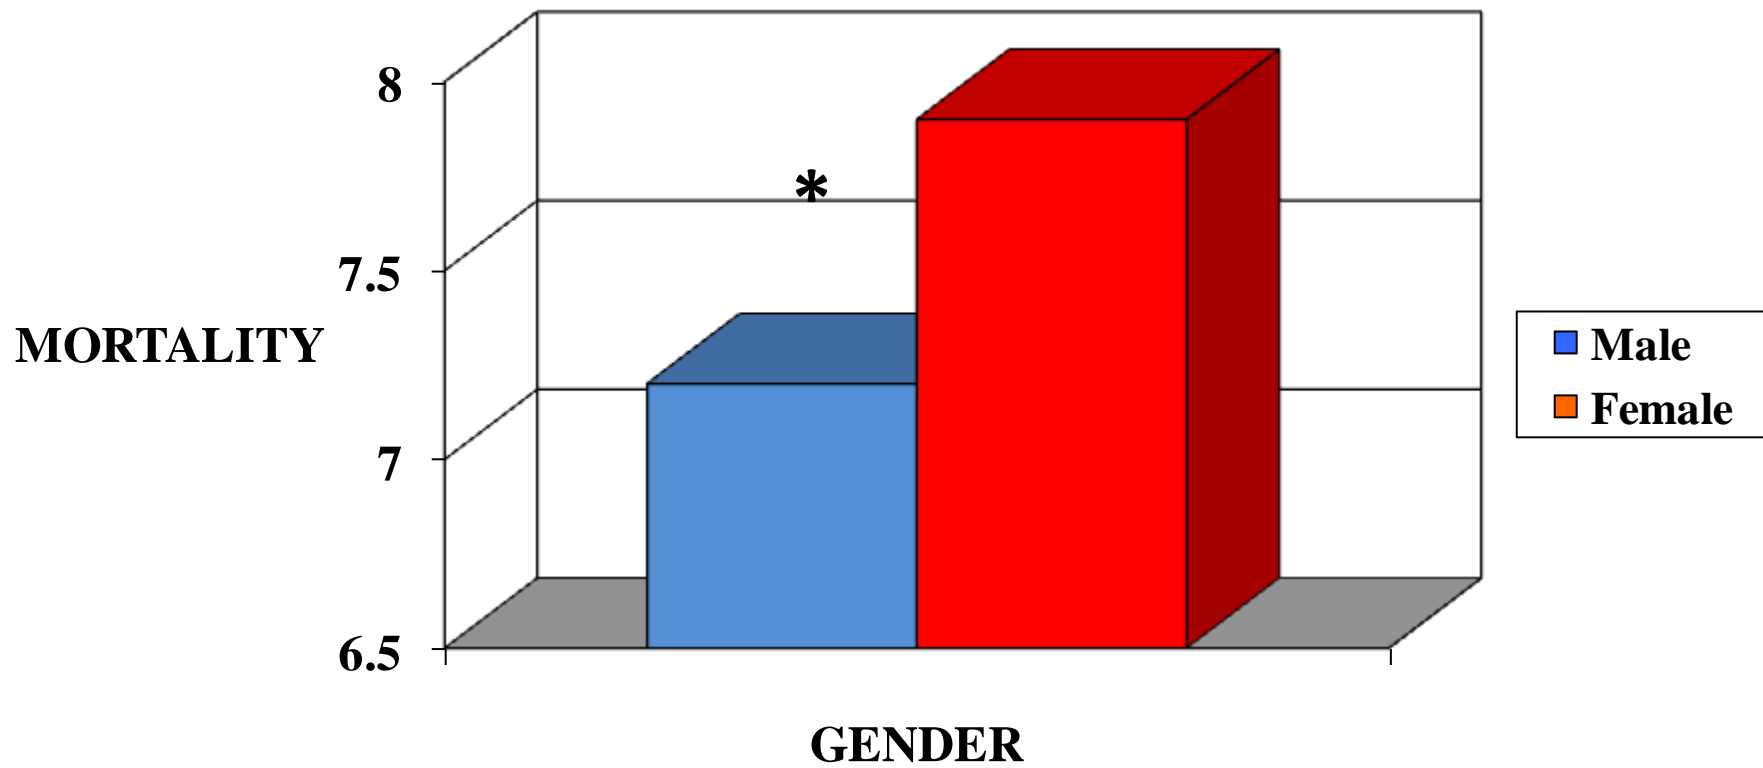

\* P-value for difference is  $<0.0001$

Supplement: MOESM1 [file 9708834]
